# Supplementary material for: Defects in fatty acid amide hydrolase 2 in a male with neurologic and psychiatric symptoms
Source: PubMed Central journal article supplement (PMC4423390; doi:10.1186/s13023-015-0248-3), 2015-03-28
Supplement: 13023_2015_248_MOESM1_ESM.pdf [file 13023_2015_248_MOESM1_ESM.pdf]

**Table S1. Variants identified on whole exome sequencing in our male patient with neurologic and psychiatric features**

| Gene symbol                        | Gene description                                                                                       | Chr   | Coordinate | Reference | Alternative | Mutation Impact             | Mutation damage                      | Gene function                                                  |
|------------------------------------|--------------------------------------------------------------------------------------------------------|-------|------------|-----------|-------------|-----------------------------|--------------------------------------|----------------------------------------------------------------|
| <b>Hemizygous model</b>            |                                                                                                        |       |            |           |             |                             |                                      |                                                                |
| FAAH2                              | FAAH2:fatty acid amide hydrolase 2                                                                     | chrX  | 57475100   | G         | T           | missense_variant            | p.Ala458Ser/c.1372G>T                | Endocannabinoid metabolism; see report                         |
| KIAA1210                           | KIAA1210:KIAA1210                                                                                      | chrX  | 118230653  | C         | T           | missense_variant            | p.Ser357Asn/c.1070G>A                | Unknown but protein coding                                     |
| KIAA1210                           | KIAA1210:KIAA1210                                                                                      | chrX  | 118239010  | G         | A           | missense_variant            | p.Ser338Leu/c.1013C>T                | Unknown but protein coding                                     |
| AKAP14                             | AKAP14:A kinase (PRKA) anchor protein 14                                                               | chrX  | 119054496  | A         | G           | missense_variant            | p.Asn114Asp/c.340A>G                 | Anchors protein kinase A in cilia                              |
| TXLNG                              | TXLNG:taxilin gamma                                                                                    | chrX  | 16846277   | A         | G           | missense_variant            | p.Ile55Val/c.163A>G                  | Binds to syntaxin and may play a role in cell cycle regulation |
| ZMYM3                              | ZMYM3:zinc finger, MYM-type 3                                                                          | chrX  | 70469939   | C         | G           | missense_variant            | p.Arg300Pro/c.899G>C                 | Part of histone deacetylase containing protein complex         |
| NRK                                | NRK:Nik related kinase                                                                                 | chrX  | 105167411  | A         | G           | missense_variant            | p.Asp971Gly/c.2912A>G                | Actin polymerization in embryogenesis                          |
| <b>Compound heterozygous model</b> |                                                                                                        |       |            |           |             |                             |                                      |                                                                |
| MUC16                              | MUC16:mucin 16, cell surface associated                                                                | chr19 | 9069507    | G         | T           | missense_variant            | p.Thr5980Asn/c.17939C>A              | Cell surface associated mucin                                  |
| MUC16                              | MUC16:mucin 16, cell surface associated                                                                | chr19 | 9050111    | G         | T           | missense_variant            | p.Thr10507Asn/c.31520C>A             |                                                                |
| CFTR                               | CFTR:cystic fibrosis transmembrane conductance regulator (ATP-binding cassette sub-family C, member 7) | chr7  | 117171029  | G         | A           | missense_variant            | p.Arg36His/c.107G>A                  | Chloride channel                                               |
| CFTR                               | CFTR:cystic fibrosis transmembrane conductance regulator (ATP-binding cassette sub-family C, member 7) | chr7  | 117199644  | ATCT      | A           | disruptive_inframe_deletion | p.Ile477_Phe478del/c.1430_1432delTCT |                                                                |

|                  |                                                                       |       |           |      |    |                  |                               |                                                                |
|------------------|-----------------------------------------------------------------------|-------|-----------|------|----|------------------|-------------------------------|----------------------------------------------------------------|
|                  | 7)                                                                    |       |           |      |    |                  |                               |                                                                |
| TTN              | TTN:titin                                                             | chr2  | 179472223 | A    | G  | missense_variant | p.Ile8666Thr/c.25997T>C       | Striated muscle protein                                        |
| TTN              | TTN:titin                                                             | chr2  | 179395554 | GC   | AA | missense_variant | p.Ala32695Phe/c.98083GC>TT    |                                                                |
| KEAP1            | KEAP1:kelch-like ECH-associated protein 1                             | chr19 | 10597342  | TCTG | T  | inframe_deletion | p.Gln620del/c.1858_1860delCAG | Targets proteins for ubiquination                              |
| KEAP1            | KEAP1:kelch-like ECH-associated protein 1                             | chr19 | 10597392  | A    | G  | missense_variant | p.Val604Ala/c.1811T>C         |                                                                |
| HIVEP2           | HIVEP2:human immunodeficiency virus type I enhancer binding protein 2 | chr6  | 143095682 | C    | A  | missense_variant | p.Gly65Val/c.194G>T           | Binds to viral promoters; may be involved in T-cell activation |
| HIVEP2           | HIVEP2:human immunodeficiency virus type I enhancer binding protein 2 | chr6  | 143094843 | T    | C  | missense_variant | p.Ile345Val/c.1033A>G         |                                                                |
| De novo mutation |                                                                       |       |           |      |    |                  |                               |                                                                |
| MYO1H            | MYO1H:myosin IH                                                       | chr12 | 109845660 | T    | A  | missense_variant | p.Val350Asp/c.1049T>A         | Myosin                                                         |
